# Supplementary material
Source: publisher site journal article supplement (https://www.dovepress.com/article/supplementary_file/544669/544669%20Revised%20Supplementary%20Material.docx)
Supplement: Supplementary file 1 [file 544669%20Revised%20Supplementary%20Material.docx]

Supplementary Table 1. Characteristics of the participants' anthropometric parameters in FLI.

| FLI quartile | Q1(0.85-3.16) | Q2(3.53-5.89) | Q3(5.90-10.93) | Q4(11.01-57.63) | P-value |
| --- | --- | --- | --- | --- | --- |
| N | 33 | 32 | 33 | 33 |  |
| Age, years | 47.00 (41.00-50.00) | 48.50 (42.00-51.00) | 46.00 (40.00-49.00) | 49.00 (44.00-51.00) | 0.341 |
| HC, cm | 90.00 (88.00-94.00) | 94.50 (92.00-99.12) | 97.00 (91.00-103.00) | 101.00 (97.00-109.00) | <0.001 |
| HT, cm | 167.00 (163.50-171.00) | 170.00 (165.88-173.62) | 169.50 (161.50-174.00) | 171.00 (167.00-175.00) | 0.070 |
| BMI, kg/m² | 23.01 (21.16-25.43) | 25.46 (23.31-27.26) | 26.84 (24.64-29.20) | 29.90 (27.63-32.50) | <0.001 |
| WT, kg | 62.70 (59.00-70.00) | 72.30 (65.83-78.95) | 79.80 (67.70-88.00) | 88.30 (80.10-98.40) | <0.001 |
| SBP, mmHg | 119.00 (109.00-127.00) | 133.50 (120.75-142.25) | 130.00 (126.00-138.00) | 135.00 (127.00-148.00) | <0.001 |
| WC, cm | 82.00 (77.00-87.00) | 88.50 (84.50-95.25) | 94.00 (87.00-102.00) | 100.00 (94.00-108.00) | <0.001 |

Supplementary Table 2. Characteristics of the participants' anthropometric parameters in VAI.

| VAI_Per quartile | Q1(32.55-48.50) | Q2(49.68-57.64) | Q3(57.85-68.89) | Q4(69.10-183.51) | P-value |
| --- | --- | --- | --- | --- | --- |
| N | 33 | 32 | 32 | 34 |  |
| Age, years | 45.00 (40.00-50.00) | 49.50 (44.00-51.00) | 47.00 (43.50-51.00) | 47.00 (40.25-49.00) | 0.199 |
| HC, cm | 88.00 (85.00-90.00) | 94.50 (92.75-97.00) | 97.50 (94.00-100.00) | 107.50 (102.00-113.00) | <0.001 |
| HT, cm | 164.00 (160.00-168.00) | 170.25 (165.00-174.00) | 171.00 (167.75-174.12) | 174.00 (164.88-177.00) | <0.001 |
| BMI, kg/m² | 21.53 (20.78-23.44) | 25.36 (24.55-26.22) | 27.65 (26.71-28.93) | 31.39 (28.91-36.26) | <0.001 |
| WT, kg | 59.60 (56.20-62.60) | 72.30 (68.35-77.57) | 79.70 (74.55-85.50) | 92.65 (88.08-101.07) | <0.001 |
| SBP, mmHg | 120.00 (107.00-128.00) | 128.00 (119.75-139.00) | 135.50 (129.25-142.25) | 135.00 (120.50-145.25) | <0.001 |
| WC, cm | 80.00 (76.00-81.00) | 88.00 (87.00-89.25) | 95.00 (93.00-97.25) | 106.00 (101.00-116.00) | <0.001 |
